# Supplementary material for: Scalable synthesis of nanometric α-Fe2O3within interconnected carbon shells from pyrolytic alginate chelates for lithium storage
Source: Royal Society of Chemistry journal article supplement (doi:10.1039/c5ra21541b), 2016-01-01
Supplement: c5ra21541b1.pdf [file c5ra21541b1.pdf]

1

## Supporting information

### 2 Scalable synthesis of nanometric $\alpha$ -Fe<sub>2</sub>O<sub>3</sub> within interconnected 3 carbon shells from pyrolytic alginate chelate for lithium storage

4 Jun Qiu,<sup>1,†</sup> Mingjie Li,<sup>2,†</sup> Yun Zhao,<sup>2,3</sup> Qingshan Kong,<sup>2,\*</sup> Xianguo Li,<sup>1,\*</sup> and Chaoxu

5 Li<sup>2,\*</sup>

6 <sup>1</sup>College of Chemistry and Chemical Engineering, Ocean University of China,

7 Qingdao 266101, China

8 <sup>2</sup>CAS Key Lab of Bio-based Materials, Qingdao Institute of Bioenergy and

9 Bioprocess Technology, Chinese Academy of Sciences, Qingdao 266101, China

10 <sup>3</sup>Institute of Materials Science and Engineering, Ocean University of China, Qingdao

11 266101, China

12 <sup>†</sup>J. Qiu & M. Li contributed equally to this work.

13 <sup>\*</sup>Corresponding authors: Chaoxu Li (E-mail: licx@qibebt.ac.cn); Qingshan Kong (E-

14 mail: kongqs@qibebt.ac.cn); Xianguo Li (E-mail: lixg@ouc.edu.cn)

15

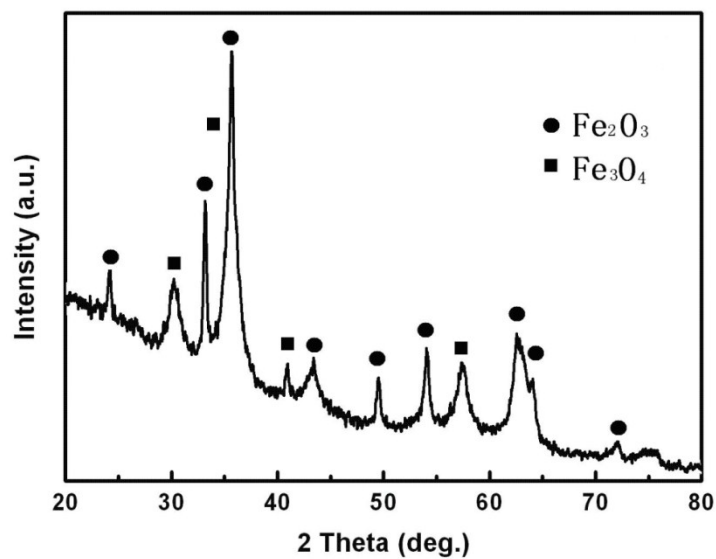

16

17

Fig. S1. XRD patterns of Fe-AFs after calcined at 300 °C.

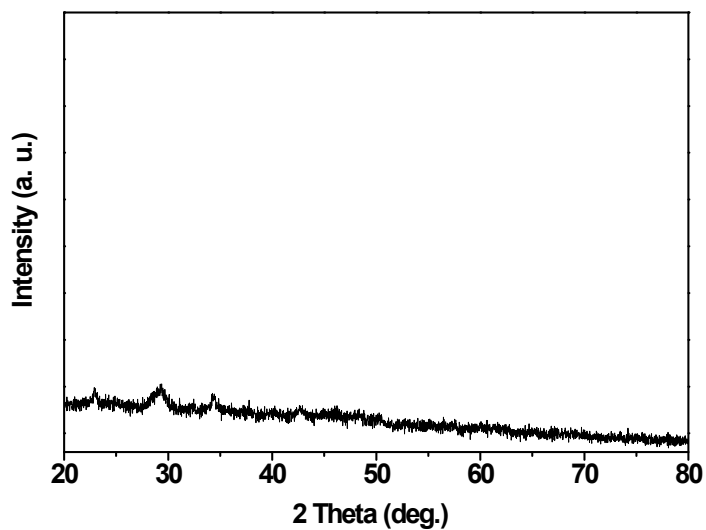

18

19 Fig. S2. XRD patterns of Fe-AFs before pyrolyzing. There is no peak of any iron oxide observed.

20 The weak peak at about 28° is from residual FeCl<sub>3</sub> (JCPDS No.01-1059) adsorbed at the surface

21 of Fe-AFs<sup>S1</sup>.

22

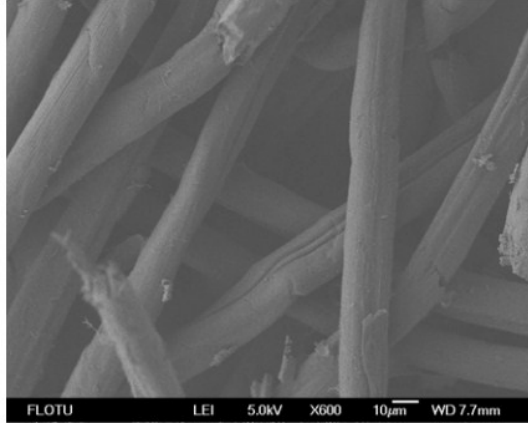

23

24

Fig. S3. SEM image of wet-spun ferrum alginate fibers.

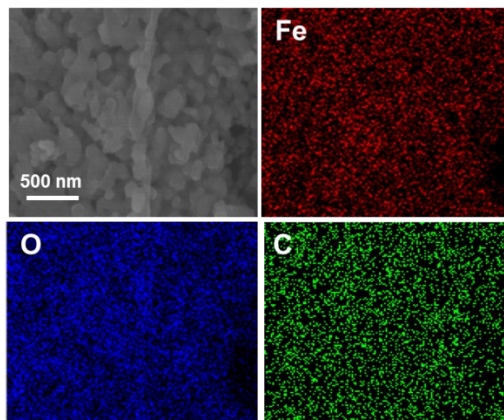

25

26 Fig. S4. SEM image and the corresponding element mapping of Fe, O and C on the surface of  
27 “Fe<sub>2</sub>O<sub>3</sub>-in-C” material.

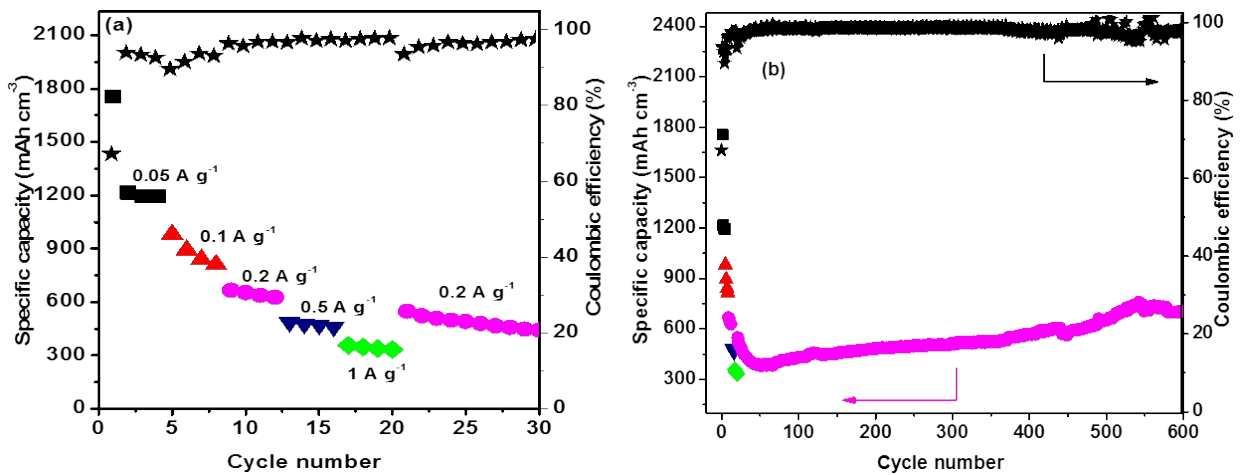

28 Fig. S5. Electrochemical performance of “Fe<sub>2</sub>O<sub>3</sub>-in-C” anodes based on tap density. (a) Rate and  
29 cycling properties for the first 30 discharge-charge cycles at different current densities. (b) Rate  
30 and cycling properties up to 600 discharge-charge cycles.

31

32 Table S1 Resistances of the equivalent circuit obtained before and after long-term discharge–  
 33 charge cycles.

| Element        | $R_s$<br>(Ohm) | $R_{ct}$<br>(Ohm) | CPE <sub>ct</sub> |                         | $R_p$<br>(Ohm) | CPE <sub>p</sub> |                         | $W (10^{-3} * S s^{0.5})$ |
|----------------|----------------|-------------------|-------------------|-------------------------|----------------|------------------|-------------------------|---------------------------|
|                |                |                   | $n$               | $Y_0 (10^{-6} * S s^n)$ |                | $n$              | $Y_0 (10^{-6} * S s^n)$ |                           |
| Before cycling | 6.16           | 145               | 0.708             | 16.0                    | --             | --               | --                      | 2.77                      |
| After cycling  | 5.09           | 18.4              | 0.684             | 232                     | 2.93           | 0.998            | 4.25                    | 21.0                      |

34 The impedance of CPE elements is defined as follows:

$$35 \quad Z = \left[ Y_0 (j\omega)^n \right]^{-1}, -1 \leq n \leq 1 \quad (S1)$$

36 where  $Y_0$  is a constant,  $\omega$  is the angular frequency and  $n$  is CPE power. A pure

37 resistance yields  $n = 0$ , a pure capacitance yields  $n = 1$ , while  $n = 0.5$  represents a

38 Warburg impedance<sup>S2, S3</sup>.

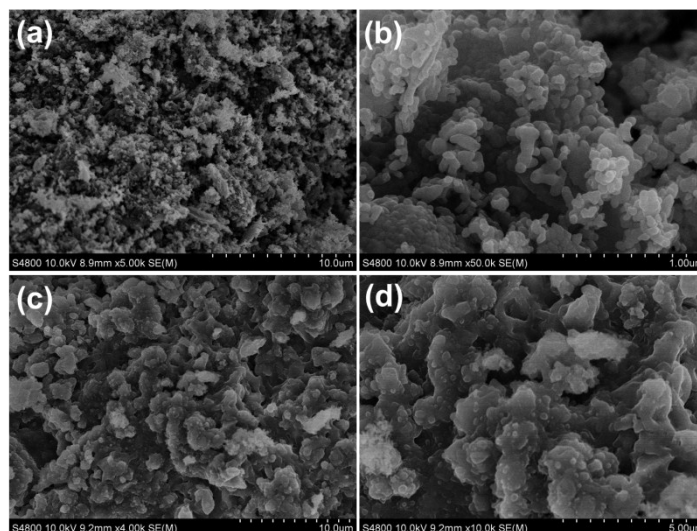

39

40

41 Fig. S6. SEM images of the anode materials (a & b) before and (c & d) after long-term cycling.

## 42 Reference

43 S1. Xin Qi, Jin Qu, Hao-Bin Zhang, Dongzhi Yang, Yunhua Yu, Cheng Chi and  
 44 Zhong-Zhen Yu, *Journal of Material Chemistry A*, 2015, **3**, 15498–15504.

45 S1. I. Milošev, M. Metikoš-Huković and H. H. Strehblow, *Biomaterials*, 2000, **21**,  
 46 2103–2113.

47 S2. Mingjie Li, Chenming Liu, Hongbin Cao, He Zhao, Yi Zhang and Zhuangjun Fan,  
 48 *Journal of Material Chemistry A*, 2014, **2**, 14844–14851.
